# Supplementary material for: Itacitinib plus calcineurin inhibitor–based therapy for prophylaxis of graft-versus-host disease: GRAVITAS-119 results
Source: Research Square preprint supplement (doi:10.21203/rs.3.rs-9915719/v1), 2026-06-11
Supplement: Supplementary file 1 [file 1c693d772633d6a91e94a013.docx]

# TABLES

**Table 1. Patient Demographics and Baseline Clinical Characteristics**

| **Parameter** | **ITA + Tac/MTX**  **(n=41)** | **ITA + CsA/MMF**  **(n=24)** | **ITA + PTCy/Tac**  **(n=19)** | **All Patients**  **(N=84)** |
| --- | --- | --- | --- | --- |
| Age, median (range), y | 65.0 (25–76) | 64.5 (42–71) | 66.0 (24–76) | 65.0 (24–76) |
| <65 y, n (%) | 20 (48.8) | 12 (50.0) | 7 (36.8) | 39 (46.4) |
| ≥65 y, n (%) | 21 (51.2) | 12 (50.0) | 12 (63.2) | 45 (53.6) |
| Men, n (%) | 22 (53.7) | 15 (62.5) | 9 (47.4) | 46 (54.8) |
| Race, n (%) |  |  |  |  |
| White | 40 (97.6) | 10 (41.7) | 15 (78.9) | 65 (77.4) |
| Black | 1 (2.4) | 1 (4.2) | 3 (15.8) | 5 (6.0) |
| Other | 0 | 8 (33.3) | 1 (5.3) | 9 (10.7) |
| Missing | 0 | 5 (20.8) | 0 | 5 (6.0) |
| ECOG status score, n (%) |  |  |  |  |
| 0 | 7 (17.1) | 15 (62.5) | 2 (10.5) | 24 (28.6) |
| 1 | 26 (63.4) | 6 (25.0) | 15 (78.9) | 47 (56.0) |
| 2 | 8 (19.5) | 3 (12.5) | 2 (10.5) | 13 (15.5) |
| Underlying malignancy, n (%) |  |  |  |  |
| AML | 17 (41.5) | 9 (37.5) | 4 (21.1) | 30 (35.7) |
| MDS | 9 (22.0) | 8 (33.3) | 7 (36.8) | 24 (28.6) |
| ALL | 6 (14.6) | 3 (12.5) | 1 (5.3) | 10 (11.9) |
| Lymphoma | 4 (9.8) | 3 (12.5) | 7 (36.8) | 14 (16.7) |
| Other | 5 (12.2) | 1 (4.2) | 0 (0.0) | 6 (7.1) |
| Disease status at time of transplant, n (%) |  |  |  |  |
| CR | 33 (80.5) | 20 (83.3) | 11 (57.9) | 64 (76.2) |
| PR | 4 (9.8) | 0 (0) | 3 (15.8) | 7 (8.3) |
| SD | 2 (4.9) | 3 (12.5) | 3 (15.8) | 8 (9.5) |
| Disease risk index, n (%) |  |  |  |  |
| Low | 4 (9.8) | 3 (12.5) | 5 (26.3) | 12 (14.3) |
| Intermediate | 27 (65.9) | 16 (66.7) | 12 (63.2) | 55 (65.5) |
| High | 10 (24.4) | 5 (20.8) | 2 (10.5) | 17 (20.2) |
| HLA donor type, n (%) |  |  |  |  |
| MRD | 21 (51.2) | 12 (50.0) | 3 (15.8) | 36 (42.9) |
| MUD | 19 (46.3) | 7 (29.2) | 12 (63.2) | 38 (45.2) |
| mmURD | 1 (2.4) | 5 (20.8) | 4 (21.1) | 10 (11.9) |
| D/R CMV status, n (%) |  |  |  |  |
| D+/R+ | 9 (22.0) | 9 (37.5) | 4 (21.1) | 22 (26.2) |
| D+/R− | 6 (14.6) | 4 (16.7) | 3 (15.8) | 13 (15.5) |
| D−/R+ | 10 (24.4) | 4 (16.7) | 6 (31.6) | 20 (23.8) |
| D−/R− | 16 (39.0) | 7 (29.2) | 6 (31.6) | 29 (34.5) |
| Conditioning regimens, n (%) |  |  |  |  |
| Busulfan/fludarabine* | 26 (63.4) | 7 (29.2) | 3 (15.8) | 36 (42.9) |
| Fludarabine/melphalan† | 10 (24.4) | 2 (8.3) | 4 (21.1) | 16 (19.0) |
| Busulfan/clofarabine | 0 | 8 (33.3) | 0 | 8 (9.5) |
| Regimens including TBI | 4 (9.8) | 3 (12.5) | 7 (36.8) | 14 (16.7) |
| Other regimens | 1 (2.4) | 4 (16.7) | 5 (26.3) | 10 (11.9) |
| Received ATG, n (%) | 9 (22.0) | 16 (66.7) | 0 | 25 (29.8) |

ALL, acute lymphocytic leukemia; AML, acute myeloid leukemia; ATG, antithymocyte globulin; CMV, cytomegalovirus; CsA, cyclosporine A; CR, complete response; D/R, donor/recipient; ECOG, Eastern Cooperative Oncology Group; HLA, human leukocyte antigen; ITA, itacitinib; MDS, myelodysplastic syndrome; MMF, mycophenolate mofetil; mmURD, 7/8 mismatched unrelated donor; MRD, 8/8 matched related donor; MTX, methotrexate; MUD, 8/8 matched unrelated donor; PR, partial response; PTCy, post-transplant cyclophosphamide; SD, stable disease; Tac, tacrolimus; TBI, total body irradiation.

* Includes fludarabine phosphate.

† Includes fludarabine phosphate and melphalan hydrochloride.

**Table 2. Hematologic Recovery at Day 28**

| **Characteristic** | **Treatment Group** | | | **Total (N=84)** |
| --- | --- | --- | --- | --- |
| **ITA + Tac/MTX (n=41)** | **ITA + CsA/MMF (n=24)** | **ITA + PTCy/Tac (n=19)** |
| ANC |  |  |  |  |
| Evaluable patients, n* | 38 | 23 | 17 | 78 |
| ANC recovery, n (%) | 37 (97.4) | 23 (100) | 17 (100) | 77 (98.7) |
| Time to ANC recovery, days, median (range) | 17 (4–31) | 18 (11–26) | 18 (13–29) | 17 (4–31) |
| Platelets |  |  |  |  |
| Evaluable patients, n* | 23 | 16 | 17 | 56 |
| Platelet recovery, n (%) | 23 (100) | 16 (100) | 14 (82.4) | 53 (94.6) |
| Time to platelet recovery, days, median (range) | 14 (11–26) | 14 (10–18) | 24 (16–41) | 15 (10–41) |
| Hematology |  |  |  |  |
| Evaluable patients, n† | 23 | 16 | 16 | 55 |
| Hematologic recovery, n (%)‡ | 22 (95.7) | 16 (100) | 13 (81.3) | 51 (92.7) |

ANC, absolute neutrophil count, CsA, cyclosporine A; ITA, itacitinib; MMF, mycophenolate mofetil; MTX, methotrexate; PTCy, post-transplant cyclophosphamide; Tac, tacrolimus.

* Evaluable patients completed 28 days of follow-up and had ≥1 ANC measurement ≤500/mm3 and/or platelet measurement ≤20 000/mm3 during the first 28 days after transplant.

† Patients meeting evaluability criteria for both ANC and platelets.

‡ At Day 28, an ANC ≥500/mm3 for 3 consecutive measurements and a platelet count ≥20 000/mm3 with no requirement for platelet transfusion in preceding 3 days.

**Table 3. Efficacy Outcomes (Efficacy-Evaluable Population)**

| **Variable** | **Treatment Group** | | | **Total (N=84)** |
| --- | --- | --- | --- | --- |
| **ITA + Tac/MTX (n=41)** | **ITA + CsA/MMF (n=24)** | **ITA + PTCy/Tac (n=19)** |
| GRFS* |  |  |  |  |
| Median GRFS, days (95% CI) | 207 (148–264) | NE (130–NE) | NE (87–NE) | 235 (182–356) |
| KM estimate (95% CI) at Day 180 | 55.1 (38.5–68.9) | 66.7 (44.3–81.7) | 63.2 (37.9–80.4) | 60.3 (49.0–69.9) |
| With ATG (n=25) | 77.8 (36.5–93.9) | 81.3 (52.5–93.5) | N/A | 80.0 (58.4–91.1) |
| Without ATG (n=59) | 48.4 (30.2–64.5) | 37.5 (8.7–67.4) | 63.2 (37.9–80.4) | 51.8 (38.3–63.7) |
| KM estimate (95% CI) at Day 365 | 27.3 (14.6–41.6) | 50.0 (29.1–67.8) | 52.6 (28.7–71.9) | 39.7 (29.2–50.0) |
| With ATG (n=25) | 44.4 (13.6–71.9) | 62.5 (34.9–81.1) | N/A | 56.0 (34.8–72.7) |
| Without ATG (n=59) | 22.6 (10.0–38.3) | 25.0 (3.7–55.8) | 52.6 (28.7–71.9) | 32.8 (21.2–44.9) |
| RFS† |  |  |  |  |
| KM estimate (95% CI) at Day 180 | 77.2 (60.7–87.4) | 86.0 (62.5–95.3) | 72.2 (45.6–87.4) | 78.5 (67.7–86.1) |
| KM estimate (95% CI) at Day 365 | 77.2 (60.7–87.4) | 81.0 (56.8–92.4) | 61.1 (35.3–79.2) | 74.6 (63.4–82.8) |
| TRM |  |  |  |  |
| Patients with TRM, n (%) | 6 (14.6) | 5 (20.8) | 1 (5.3) | 12 (14.3) |
| Cumulative incidence rate at Day 180, % (95% CI) | 5.0 (0.9–15.0) | 16.7 (5.0–34.1) | 5.3 (0.3–22.0) | 8.4 (3.7–15.6) |
| With ATG | NE | 18.8 (4.3–41.0) | N/A | 12.0 (2.9–28.0) |
| Without ATG | 6.5 (1.1–18.9) | 12.5 (0.5–44.5) | 5.3 (0.3–22.0) | 6.8 (2.2–15.3) |
| Cumulative incidence rate at Day 365, % (95% CI) | 15.1 (6.0–28.0) | 20.8 (7.4–39.0) | 5.3 (0.3–22.0) | 14.5 (7.9–23.0) |
| With ATG | NE | 25.0 (7.3–48.0) | N/A | 16.0 (4.9–32.9) |
| Without ATG | 19.4 (7.7–34.9) | 12.5 (0.5–44.5) | 5.3 (0.3–22.0) | 13.8 (6.4–24.0) |
| aGVHD cumulative incidence rate, % (95% CI) |  |  |  |  |
| Any aGVHD at Day 100 | 19.5 (9.0–32.9) | 25.0 (9.9–43.6) | 36.8 (15.9–58.2) | 25.0 (16.3–34.7) |
| With ATG | 33.3 (6.7–64.0) | 31.3 (10.8–54.5) | N/A | 32.0 (14.9–50.6) |
| Without ATG | 15.6 (5.6–30.3) | 12.5 (0.5–44.8) | 36.8 (15.9–58.2) | 22.0 (12.4–33.4) |
| Any aGVHD at Day 180 | 31.7 (18.1–46.2) | 25.0 (9.9–43.6) | 42.1 (19.6–63.2) | 32.1 (22.4–42.3) |
| With ATG | 33.3 (6.7–64.0) | 31.3 (10.8–54.5) | N/A | 32.0 (14.9–50.6) |
| Without ATG | 31.3 (16.1–47.7) | 12.5 (0.5–44.8) | 42.1 (19.6–63.2) | 32.2 (20.7–44.3) |
| Grade 2–4 at Day 100 | 7.4 (1.9–18.1) | 4.2 (0.3–18.0) | 10.5 (1.7–29.1) | 7.2 (2.9–14.1) |
| Grade 2–4 at Day 180 | 14.9 (5.9–27.7) | 8.3 (1.4–23.7) | 15.8 (3.7–35.6) | 13.2 (7.0–21.5) |
| Grade 3–4 at Day 100 | 2.4 (0.2–11.2) | 4.2 (0.3–18.0) | 0 (NE–NE) | 2.4 (0.4–7.5) |
| Grade 3–4 at Day 180 | 7.4 (1.9–18.3) | 4.2 (0.3–18.0) | 0 (NE–NE) | 4.8 (1.5–10.9) |
| cGVHD cumulative incidence rate, % (95% CI) |  |  |  |  |
| Any cGVHD at Day 180 | 17.5 (7.6–30.8) | 16.7 (5.0–34.2) | 15.8 (3.7–35.6) | 16.9 (9.7–25.7) |
| With ATG | 22.2 (2.8–53.3) | 18.8 (4.2–41.2) | N/A | 20.0 (7.0–37.7) |
| Without ATG | 16.1 (5.7–31.2) | 12.5 (0.5–44.8) | 15.8 (3.7–35.6) | 15.5 (7.6–26.1) |
| Any cGVHD at Day 365 | 46.4 (29.5–61.7) | 37.5 (18.4–56.6) | 21.1 (6.2–41.7) | 37.8 (27.3–48.3) |
| With ATG | 44.4 (11.4–73.9) | 43.8 (18.5–66.7) | N/A | 45.0 (24.1–63.9) |
| Without ATG | 45.2 (26.9–61.8) | 25.0 (2.9–58.3) | 21.1 (6.2–41.7) | 34.5 (22.5–46.8) |
| Moderate/severe cGVHD at Day 180 | 10.0 (3.1–21.7) | 0 (NE–NE) | 0 (NE–NE) | 4.8 (1.6–11.0) |
| Moderate/severe cGVHD at Day 365 | 33.9 (19.1–49.3) | 8.3 (1.4–23.8) | 5.3 (0.3–22.1) | 19.9 (11.9–29.3) |
| KM estimate of OS at 1 y, % (95% CI)‡ | 74.9 (58.4–85.6) | 79.2 (57.0–90.8) | 84.2 (58.7–94.6) | 78.3 (67.8–85.7) |

aGVHD, acute graft-versus-host disease; ATG, antithymocyte globulin; cGVHD, chronic graft-versus-host disease; CsA, cyclosporine A; GRFS, GVHD-free, relapse-free survival; ITA, itacitinib; KM, Kaplan-Meier; MMF, mycophenolate mofetil; MTX, methotrexate; N/A, not applicable; NE, not evaluable; OS, overall survival; PTCy, post-transplant cyclophosphamide; RFS, relapse-free survival; Tac, tacrolimus; TRM, transplant-related mortality.

* Number of patients with failure event: ITA+Tac/MTX, 29 (71%); ITA+CsA/MMF, 12 (50%); ITA+PTCy/Tac, 9 (47%); total, 50 (60%). Number of patients censored at last date known alive: ITA+Tac/MTX, 12 (29%); ITA+CsA/MMF, 12 (50%); ITA+PTCy/Tac, 10 (53%); total, 34 (41%).

† Number of censored patients: ITA+Tac/MTX, 32 (78%); ITA+CsA/MMF, 20 (83%); ITA+PTCy/Tac, 12 (63%); total, 64 (76%).

‡ Number of censored patients: ITA+Tac/MTX, 31 (76%); ITA+CsA/MMF, 18 (75%); ITA+PTCy/Tac, 16 (84%); total, 65 (77%).
