# Supplementary material for: Itacitinib plus calcineurin inhibitor–based therapy for prophylaxis of graft-versus-host disease: GRAVITAS-119 results
Source: Research Square preprint supplement (doi:10.21203/rs.3.rs-9915719/v1), 2026-06-11
Supplement: Supplementary file 2 [file 57a684ec4de435026fb6b00f.docx]

# Supplementary Information

**Itacitinib plus calcineurin inhibitor–based therapy for prophylaxis of graft-versus-host disease: GRAVITAS-119 results**

Nirav N. Shah, MD,1 Hannah Choe, MD,2 Nancy M. Hardy, MD,3 Patrice Chevallier, MD,4 Marie-Therese Rubio, MD, PhD,5 Mark A. Schroeder, MD,6 Carlos Solano, MD,7 Amelia Langston, MD,8 Patrick Stiff, MD,9 Kevin Hou, PhD,10 Michael Arbushites,10 Michael Pratta, MS,10 Rodica Morariu-Zamfir, MD,10 Miguel-Angel Perales, MD11,12

1BMT & Cellular Therapy Program, Medical College of Wisconsin, Milwaukee, WI, USA; 2The Ohio State University, Comprehensive Cancer Center, Columbus, OH, USA; 3University of Maryland, Greenebaum Cancer Center, Baltimore, MD, USA; 4CHU de Nantes, Nantes, France; 5Hematology Department, Nancy University Hospital, Vandœuvre-les-Nancy, France; 6Washington University School of Medicine in Saint Louis, St. Louis, MO, USA; 7Hospital Clinico Universitario, University of Valencia, Valencia, Spain; 8Winship Cancer Institute of Emory University, Atlanta, GA, USA; 9Loyola University Medical Center, Maywood, IL, USA; 10Incyte Corporation, Wilmington, DE, USA; 11Memorial Sloan Kettering Cancer Center, New York, NY, USA; 12Weill Cornell Medical College, New York, NY, USA

[Supplementary Methods 2](#_Toc229518236)

[Supplementary Results 3](#_Toc229518237)

[Table S1. Treatment-Emergent Adverse Events (Safety Population) 4](#_Toc229518238)

[Table S2. Itacitinib Treatment-Related Treatment-Emergent Adverse Events (Safety Population) 5](#_Toc229518239)

[Table S3. Select Laboratory Abnormalities (Safety Population) 6](#_Toc229518240)

[Table S4. Grade ≥3 Infections Occurring During Treatment 7](#_Toc229518241)

[Table S5. Primary Cause of Death 8](#_Toc229518242)

[Figure S1. Biomarker Concentrations Over Time 9](#_Toc229518243)

Supplementary Methods

*Eligibility Requirements*

Other eligibility requirements were: candidacy for RIC regimens; peripheral blood stem cell transplants from 8/8 matched related or unrelated or 7/8 mismatched unrelated donors; Karnofsky score ≥70% or Eastern Cooperative Oncology Group performance status 0−2; and serum creatinine concentrations ≤2.0 mg/dL or creatinine clearance ≥40 mL/min.

Key exclusion criteria included previous JAK inhibitor treatment, previous allo-HSCT, candidacy for myeloablative conditioning regimens, active uncontrolled infection, or severe organ dysfunction (e.g., cholestatic disorders, unresolved veno-occlusive liver disease, clinically significant or uncontrolled cardiac disease, or clinically significant respiratory disease requiring mechanical ventilation support or oxygen).

*Biomarker Analysis*

Broad proteomic analysis of serum samples (exploratory endpoint) used a proximal extension assay (Olink Proteomics, Watertown, MA, USA), with a >1000-protein library. Whole-blood samples were collected at Days −3, 28, 56, and 100.

Limited sample availability precluded robust statistical analysis of biomarkers between cohorts. Thus, data from the tacrolimus/methotrexate and CsA/MMF cohorts were combined and evaluated based on onset of aGVHD and/or cGVHD post-transplant and compared with patients who did not develop GVHD; patients who developed both aGVHD and cGVHD were included in each individual cohort. Because the PTCy cohort was still enrolling when biomarker studies were conducted, samples from this cohort were not included.

*Determination of sample size*

Sample size was based on the minimum number of interpretable tolerability profiles across treatment regimens needed to inform this proof-of-concept design. Tolerability of itacitinib was monitored using a Bayesian approach (events of interest were: death, ANC and platelet engraftment failure, and diagnosis of grade 3–4 aGVHD before Day 28). Enrollment of 25−30 patients/treatment group was targeted to compensate for differences in regional practice (e.g., addition of ATG to prophylaxis regimens). As the purpose for this trial was hypothesis generation, results would potentially inform the design of a larger, hypothesis-testing trial.

Supplementary Results

*Infections*

Twelve of 13 clinically notable CMV infection events were CMV reactivation and viremia cases. The exception was in one patient treated with itacitinib/CsA/MMF + ATG who experienced refractory CMV pneumonia with fatal outcome. Eleven patients with CMV reactivation received antiviral treatment. In one patient (itacitinib/tacrolimus/methotrexate), CMV viremia occurred while being treated with prophylactic letermovir. CMV infections were considered related to itacitinib in two patients (2.4%) per investigator assessment, one of whom was treated with itacitinib/CsA/MMF + ATG, and the other with itacitinib/tacrolimus/methotrexate.

Five patients (6.0%) experienced Epstein-Barr virus infection events, one of which (nonserious, grade 2 Epstein-Barr virus reactivation) was considered related to itacitinib per investigator assessment. There were no cases of post-transplant lymphoproliferative disorder.

*Deaths*

Four patients (4.8%) died on treatment (ie, within 30 days of last dose of itacitinib): two who received itacitinib/CsA/MMF + ATG (CMV infection; post-traumatic intracranial hemorrhage) and one each who received itacitinib/CsA/MMF without ATG (sepsis) and itacitinib/PTCy/tacrolimus (organ failure due to transplant-associated microangiopathy; **Table S5**).

An additional 15 patients (17.9%) died during post-treatment follow-up (>30 days after the last itacitinib dose through Day 371), including three (12%) who received ATG (one in the itacitinib/tacrolimus/methotrexate group, two in the itacitinib/CsA/MMF group [both due to aGVHD]), and 12 (20.3%) who did not receive ATG (nine in the itacitinib/tacrolimus/methotrexate group, one in the itacitinib/CsA/MMF group, and two in the itacitinib/PTCy/tacrolimus group; **Table S5**).

Table S1. Treatment-Emergent Adverse Events (Safety Population)

| **Event, n (%)** | **ITA + Tac/MTX**  **(n=41)** | | **ITA + CsA/MMF**  **(n=24)** | | **ITA + PTCy/Tac**  **(n=19)** | | **All Patients**  **(N=84)** | |
| --- | --- | --- | --- | --- | --- | --- | --- | --- |
| **Any Grade** | **Grade ≥3** | **Any Grade** | **Grade ≥3** | **Any Grade** | **Grade ≥3** | **Any Grade** | **Grade ≥3** |
| Any TEAE, n (%) | 41 (100) | 38 (92.7) | 24 (100) | 19 (79.2) | 19 (100) | 15 (78.9) | 84 (100) | 72 (85.7) |
| Hematologic TEAEs* |  |  |  |  |  |  |  |  |
| Anemia | 18 (43.9) | 13 (31.7) | 9 (37.5) | 7 (29.2) | 10 (52.6) | 9 (47.4) | 37 (44.0) | 29 (34.5) |
| Platelet count decreased | 24 (58.5) | 19 (46.3)† | 2 (8.3) | 1 (4.2) | 11 (57.9) | 10 (52.6)† | 37 (44.0) | 30 (35.7)† |
| White blood cell count decreased | 20 (48.8) | 18 (43.9)† | 2 (8.3) | 2 (8.3) | 10 (52.6) | 10 (52.6)† | 32 (38.1) | 30 (35.7)† |
| Neutrophil count decreased | 17 (41.5) | 15 (36.6)† | 3 (12.5) | 3 (12.5) | 3 (15.8) | 3 (15.8) | 23 (27.4) | 21 (25.0)† |
| Lymphocyte count decreased | 17 (41.5) | 15 (36.6) | 2 (8.3) | 2 (8.3) | 3 (15.8) | 2 (10.5) | 22 (26.2) | 19 (22.6) |
| Nonhematologic TEAEs* |  |  |  |  |  |  |  |  |
| Diarrhea | 24 (58.5) | 9 (22.0) | 14 (58.3) | 1 (4.2) | 10 (52.6) | 1 (5.3) | 48 (57.1) | 11 (13.1) |
| Nausea | 24 (58.5) | 0 | 13 (54.2) | 0 | 6 (31.6) | 0 | 43 (51.2) | 0 |
| Fatigue | 23 (56.1) | 0 | 3 (12.5) | 0 | 9 (47.4) | 0 | 35 (41.7) | 0 |
| Hypomagnesemia | 25 (61.0) | 0 | 3 (12.5) | 0 | 7 (36.8) | 1 (5.3) | 35 (41.7) | 1 (1.2) |
| Pyrexia | 17 (41.5) | 0 | 13 (54.2) | 1 (4.2) | 5 (26.3) | 0 | 35 (41.7) | 1 (1.2) |
| Stomatitis | 15 (36.6) | 3 (7.3) | 9 (37.5) | 2 (8.3) | 5 (26.3) | 1 (5.3) | 29 (34.5) | 6 (7.1) |
| Headache | 13 (31.7) | 1 (2.4) | 7 (29.2) | 1 (4.2) | 8 (42.1) | 0 | 28 (33.3) | 2 (2.4) |
| Vomiting | 12 (29.3) | 0 | 10 (41.7) | 0 | 6 (31.6) | 0 | 28 (33.3) | 0 |
| Hypertriglyceridemia | 23 (56.1) | 8 (19.5) | 1 (4.2) | 0 | 3 (15.8) | 0 | 27 (32.1) | 8 (9.5) |
| Hypertension | 12 (29.3) | 7 (17.1) | 9 (37.5) | 2 (8.3) | 3 (15.8) | 0 | 24 (28.6) | 9 (10.7) |
| Blood creatinine increased | 15 (36.6) | 0 | 3 (12.5) | 0 | 5 (26.3) | 0 | 23 (27.4) | 0 |
| Decreased appetite | 9 (22.0) | 0 | 7 (29.2) | 2 (8.3) | 4 (21.1) | 0 | 20 (23.8) | 2 (2.4) |
| Hyperkalemia | 12 (29.3) | 1 (2.4) | 5 (20.8) | 1 (4.2) | 2 (10.5) | 1 (5.3) | 19 (22.6) | 3 (3.6) |
| Hypokalemia | 7 (17.1) | 0 | 5 (20.8) | 1 (4.2) | 7 (36.8) | 1 (5.3) | 19 (22.6) | 2 (2.4) |
| AST increased | 13 (31.7) | 2 (4.9) | 1 (4.2) | 0 | 4 (21.1) | 0 | 18 (21.4) | 2 (2.4) |
| Hyponatremia | 12 (29.3) | 3 (7.3) | 1 (4.2) | 0 | 5 (26.3) | 1 (5.3) | 18 (21.4) | 4 (4.8) |
| Insomnia | 11 (26.8) | 0 | 3 (12.5) | 0 | 4 (21.1) | 0 | 18 (21.4) | 0 |
| Back pain | 8 (19.5) | 1 (2.4) | 7 (29.2) | 0 | 2 (10.5) | 0 | 17 (20.2) | 1 (1.2) |

AST, aspartate aminotransferase; CsA, cyclosporine A; ITA, itacitinib; MedDRA, Medical Dictionary for Regulatory Activities; MMF, mycophenolate mofetil; MTX, methotrexate; PTCy, post-transplant cyclophosphamide; Tac, tacrolimus; TEAE, treatment-emergent adverse event.

* Occurring in ≥20% of the total patient population for any grade at any time during study period (through end of safety follow-up).

† The only grade 4 or 5 TEAEs occurring in ≥20% of the total patient population by MedDRA system organ class term were white blood cell count decreased (ITA+Tac/MTX, 15 [36.6%]; ITA+PTCy/Tac, 8 [42.1%]; total population, 24 [28.6%]), platelet count decreased (ITA+Tac/MTX, 11 [26.8%]; ITA+PTCy/Tac, 10 [52.6%]; total population, 21 [25.0%]), and neutrophil count decreased (ITA+Tac/MTX, 14 [34.1%]; total population, 19 [22.6%]); reported here for incidences ≥20% in the total population and any individual treatment groups.

Table S2. Itacitinib Treatment-Related Treatment-Emergent Adverse Events (Safety Population)

| **Adverse Event, n (%)*** | **ITA + Tac/MTX**  **(n=41)** | | **ITA + CsA/MMF**  **(n=24)** | | **ITA + PTCy/Tac**  **(n=19)** | | **All Patients**  **(N=84)** | |
| --- | --- | --- | --- | --- | --- | --- | --- | --- |
| **Any Grade** | **Grade ≥3** | **Any Grade** | **Grade ≥3** | **Any Grade** | **Grade ≥3** | **Any Grade** | **Grade ≥3** |
| Any itacitinib-related TEAE, n (%) | 26 (63.4) | 17 (41.5) | 11 (45.8) | 6 (25.0) | 14 (73.7) | 8 (42.1) | 51 (60.7) | 31 (36.9) |
| Platelet count decreased | 7 (17.1) | 2 (4.9) | 0 (0) | 0 (0) | 8 (42.1) | 6 (31.6) | 15 (17.9) | 8 (9.5) |
| White blood cell count decreased | 6 (14.6) | 2 (4.9) | 0 (0) | 0 (0) | 7 (36.8) | 4 (21.1) | 13 (15.5) | 6 (7.1) |
| Hypertriglyceridemia | 11 (26.8) | 7 (17.1) | 0 (0) | 0 (0) | 0 (0) | 0 (0) | 11 (13.1) | 7 (8.3) |
| Anemia | 3 (7.3) | 3 (7.3) | 1 (4.2) | 0 (0) | 6 (31.6) | 5 (26.3) | 10 (11.9) | 8 (9.5) |
| Lymphocyte count decreased | 5 (12.2) | 4 (9.8) | 0 (0) | 0 (0) | 2 (10.5) | 2 (10.5) | 7 (8.3) | 6 (7.1) |
| Neutrophil count decreased | 3 (7.3) | 2 (4.9) | 0 (0) | 0 (0) | 3 (15.8) | 2 (10.5) | 6 (7.1) | 4 (4.8) |
| Thrombocytopenia | 2 (4.9) | 2 (4.9) | 2 (8.3) | 1 (4.2) | 0 (0) | 0 (0) | 4 (4.8) | 3 (3.6) |
| Hyperglycemia | 3 (7.3) | 2 (4.9) | 0 (0) | 0 (0) | 0 (0) | 0 (0) | 3 (3.6) | 2 (2.4) |
| Hepatic cytolysis | 1 (2.4) | 1 (2.4) | 1 (4.2) | 1 (4.2) | 0 (0) | 0 (0) | 2 (2.4) | 2 (2.4) |

CsA, cyclosporine A; ITA, itacitinib; MMF, mycophenolate mofetil; MTX, methotrexate; PTCy, post-transplant cyclophosphamide; Tac, tacrolimus; TEAE, treatment-emergent adverse event.

* TEAEs judged as related to itacitinib or missing an assigned causality, occurring at any time during the study period (through end of safety follow-up) in ≥5% of the total patient population for any grade or occurring in ≥2% for grade ≥3 TEAEs.

Table S3. Select Laboratory Abnormalities (Safety Population)

| **Event, n (%)** | **ITA + Tac/MTX**  **(n=41)** | | **ITA + CsA/MMF**  **(n=24)** | | **ITA + PTCy/Tac**  **(n=19)** | | **All Patients**  **(N=84)** | |
| --- | --- | --- | --- | --- | --- | --- | --- | --- |
| **Any Grade** | **Grade ≥3** | **Any Grade** | **Grade ≥3** | **Any Grade** | **Grade ≥3** | **Any Grade** | **Grade ≥3** |
| Hematologic laboratory abnormalities |  |  |  |  |  |  |  |  |
| Anemia | 32 (78.0) | 18 (43.9) | 20 (83.3) | 11 (45.8) | 16 (84.2) | 14 (73.7) | 68 (81.0) | 43 (51.2) |
| Neutropenia | 40 (97.6) | 39 (95.1) | 23 (95.8) | 23 (95.8) | 6 (31.6) | 6 (31.6) | 69 (82.1) | 68 (81.0) |
| Thrombocytopenia | 39 (95.1) | 35 (85.4) | 22 (91.7) | 20 (83.3) | 11 (57.9) | 10 (52.6) | 72 (85.7) | 65 (77.4) |

CsA, cyclosporine A; ITA, itacitinib; MMF, mycophenolate mofetil; MTX, methotrexate; PTCy, post-transplant cyclophosphamide; Tac, tacrolimus.

Table S4. Grade ≥3 Infections Occurring During Treatment

| **Infection, n (%)*** | **Treatment Group** | | | | | | | **All Patients**  **(N=84)** |
| --- | --- | --- | --- | --- | --- | --- | --- | --- |
| **ITA + Tac/MTX** | | | **ITA + CsA/MMF** | | | **ITA + PTCy/Tac**  **(n=19)** |
| **+ATG (n=9)** | **No ATG (n=32)** | **Total (n=41)** | **+ATG (n=16)** | **No ATG (n=8)** | **Total (n=24)** |
| Any grade ≥3 infection | 3 (33.3) | 7 (21.9) | 10 (24.4) | 6 (37.5) | 3 (37.5) | 9 (37.5) | 4 (21.1) | 23 (27.4) |
| Any infection – pathogen unspecified |  |  |  |  |  |  |  |  |
| Pneumonia | 1 (11.1) | 1 (3.1) | 2 (4.9) | 0 | 1 (12.5) | 1 (4.2) | 0 | 3 (3.6) |
| Sepsis | 1 (11.1) | 0 | 1 (2.4) | 0 | 1 (12.5) | 1 (4.2) | 0 | 2 (2.4) |
| Septic shock | 0 | 1 (3.1) | 1 (2.4) | 1 (6.3) | 0 | 1 (4.2) | 0 | 2 (2.4) |
| UTI | 0 | 1 (3.1) | 1 (2.4) | 0 | 0 | 0 | 2 (10.5) | 3 (3.6) |
| Bacterial infections |  |  |  |  |  |  |  |  |
| *C diff* colitis | 0 | 1 (3.1) | 1 (2.4) | 0 | 0 | 0 | 1 (5.3) | 2 (2.4) |
| Escherichia bacteremia | 1 (11.1) | 1 (3.1) | 2 (4.9) | 0 | 0 | 0 | 0 | 2 (2.4) |
| Viral infections |  |  |  |  |  |  |  |  |
| Viral hemorrhagic cystitis | 0 | 0 | 0 | 2 (12.5) | 0 | 2 (8.3) | 0 | 2 (2.4) |
| CMV infection reactivation | 0 | 0 | 0 | 2 (12.5) | 0 | 2 (8.3) | 0 | 2 (2.4) |
| CMV viremia | 0 | 2 (6.3) | 2 (4.9) | 0 | 0 | 0 | 0 | 2 (2.4) |

ATG, antithymocyte globulin; *C diff*, *Clostridium difficile*; CMV, cytomegalovirus; CsA, cyclosporine A; ITA, itacitinib; MMF, mycophenolate mofetil; MTX, methotrexate; PTCy, post-transplant cyclophosphamide; Tac, tacrolimus; UTI, urinary tract infection.

* Occurring in >1 patient within the total patient population.

Table S5. Primary Cause of Death

| **Primary Cause, n (%)** | **Treatment Group** | | | | | **All Patients**  **(N=84)** |
| --- | --- | --- | --- | --- | --- | --- |
| **ITA + Tac/MTX** | | **ITA + CsA/MMF** | | **ITA + PTCy/Tac**  **(n=19)** |
| **+ATG (n=9)** | **No ATG (n=32)** | **+ATG (n=16)** | **No ATG (n=8)** |
| Death on treatment* | 0 | 0 | 2 (12.5) | 1 (12.5) | 1 (5.3) | 4 (4.8) |
| Infection | 0 | 0 | 1 (6.3) | 1 (12.5) | 0 | 2 (2.4) |
| Other | 0 | 0 | 1 (6.3) | 0 | 0 | 1 (1.2) |
| Organ failure† | 0 | 0 | 0 | 0 | 1 (5.3) | 1 (1.2) |
| Death during follow-up‡ | 1 (11.1) | 9 (28.1) | 2 (12.5) | 1 (12.5) | 2 (10.5) | 15 (17.9) |
| Malignancy | 1 (11.1) | 3 (9.4) | 0 | 1 (12.5) | 2 (10.5) | 7 (8.3) |
| aGVHD | 0 | 0 | 2 (12.5) | 0 | 0 | 2 (2.4) |
| Infection | 0 | 3 (9.4) | 0 | 0 | 0 | 3 (3.6) |
| Organ failure† | 0 | 2 (6.3) | 0 | 0 | 0 | 2 (2.4) |
| Other | 0 | 1 (3.1) | 0 | 0 | 0 | 1 (1.2) |

aGVHD, acute graft-versus-host disease; ATG, antithymocyte globulin; CsA, cyclosporine A; ITA, itacitinib; MMF, mycophenolate mofetil; MTX, methotrexate; PTCy, post-transplant cyclophosphamide; Tac, tacrolimus.

* Death within 30 days after last dose of itacitinib.

† Not related to GVHD or infection.

‡ Death >30 days after last dose of itacitinib.

Figure S1. Biomarker Concentrations Over Time


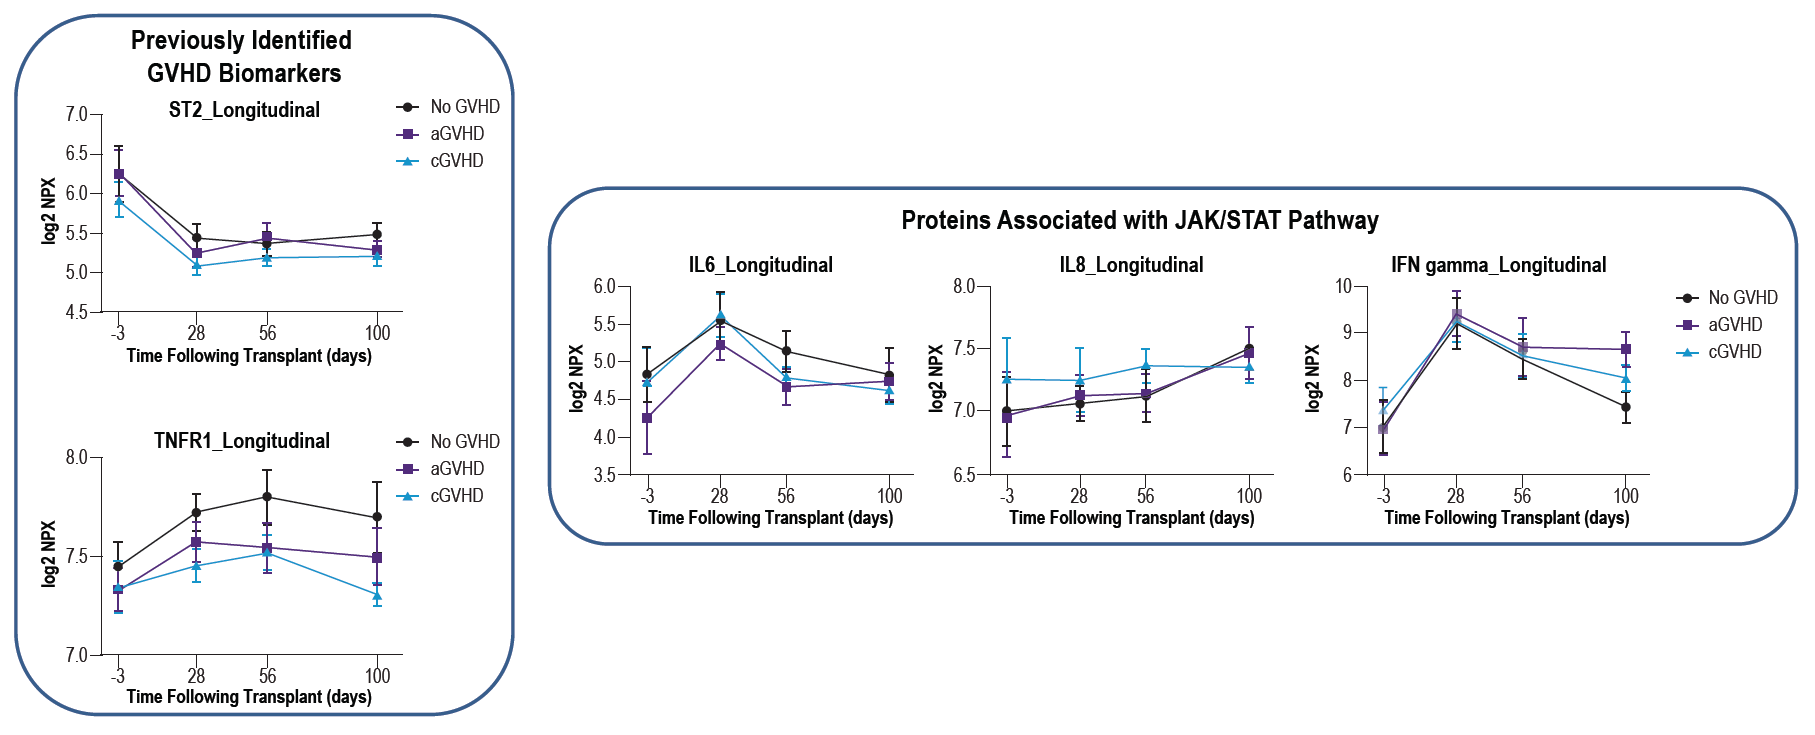


For IFN-γ, ½ limit of detection = 1.76468. aGVHD, acute graft-versus-host disease; cGVHD, chronic graft-versus-host disease; GVHD, graft-versus-host disease; IFN, interferon; IL, interleukin; JAK, Janus kinase; NPX, normalized protein expression; ST2, serum stimulation-2; STAT, signal transducer and activator of transcription; TNFR, tumor necrosis factor receptor.
